## Correction for: Mitochondria and aging in older individuals: an analysis of DNA methylation age metrics, leukocyte telomere length, and mitochondrial DNA copy number in the VA normative aging study

Jacopo Dolcini<sup>1,2</sup>, Haotian Wu<sup>1</sup>, Jamaji C. Nwanaji-Enwerem<sup>3</sup>, Marianthi-Anna Kiomourtozlogu<sup>1</sup>, Akin Cayir<sup>3,4</sup>, Marco Sanchez-Guerra<sup>5</sup>, Pantel Vokonas<sup>6</sup>, Joel Schwarz<sup>3</sup>, Andrea A. Baccarelli<sup>1</sup>

<sup>1</sup>Department of Environmental Health Sciences, Mailman School of Public Health, Columbia University, New York, NY 10032, USA

<sup>2</sup>Department of Biomedical Sciences and Public Health, Section of Hygiene and Preventive Medicine, Medical School, Polytechnic University of Marche, Ancona, Italy

<sup>3</sup>Department of Environmental Health, Harvard T.H. Chan School of Public Health, Boston, MA 02115, USA

<sup>4</sup>Vocational Health College, Canakkale Onsekiz Mart University, Canakkale, Turkey

<sup>5</sup>Department of Developmental Neurobiology, National Institute of Perinatology, Lomas Virreyes, Mexico

<sup>6</sup>Veterans Affairs Normative Aging Study, Veterans Affairs Boston Healthcare System, Department of Medicine, Boston University School of Medicine, Boston, MA 02118, USA

Correspondence to: Andrea A. Baccarelli; email: [ab4303@cumc.columbia.edu](mailto:ab4303@cumc.columbia.edu)

Original article: [Aging \(Albany NY\) 2019; 12: 2070–2083](#)

PMID: 32009007

PMCID: PMC7041780

doi: [10.18632/aging.102722](https://doi.org/10.18632/aging.102722)

**This article has been corrected:** The authors requested to correct the last name of Marianthi-Anna Kioumourtzoglou which was misspelled. This mistake does not change the content of publication. The correct author's name is provided below:

Jacopo Dolcini<sup>1,2</sup>, Haotian Wu<sup>1</sup>, Jamaji C. Nwanaji-Enwerem<sup>3</sup>, Marianthi-Anna **Kioumourtzoglou**<sup>1</sup>, Akin Cayir<sup>3,4</sup>, Marco Sanchez-Guerra<sup>5</sup>, Pantel Vokonas<sup>6</sup>, Joel Schwarz<sup>3</sup>, Andrea A. Baccarelli<sup>1</sup>
